# Supplementary material
Source: publisher figshare collection journal article supplement (https://acs.figshare.com/ndownloader/files/4123825)
Supplement: Supplementary file 1 [file 4123825]

**Lead(II)-Catalyzed Oxidation of Guanine in Solution  
Studied with Electrospray Ionization Mass Spectrometry**

Laura Banu, Voislav Blagojevic and Diethard K. Bohme\*

**Supporting Information**

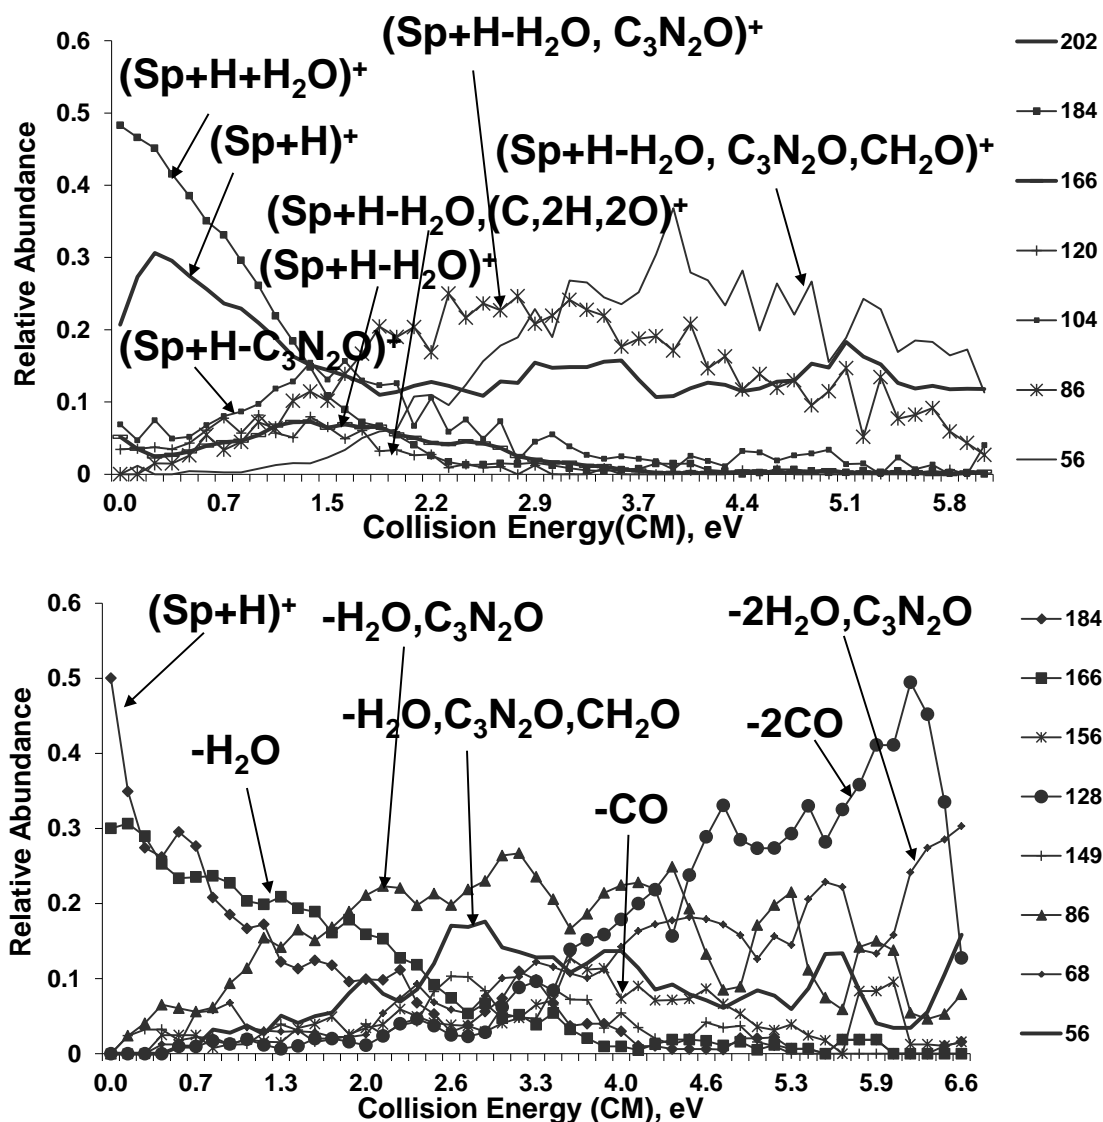

**Figure S1.** Dissociation profile for the product ions observed in oxidation of guanine by peroxymonosulfuric acid:  $(\text{Sp}+\text{H}+\text{H}_2\text{O})^+$  (top) and  $(\text{Sp}+\text{H})^+$  (bottom). The early onset of water loss in  $(\text{Sp}+\text{H}+\text{H}_2\text{O})^+$  and commonality in the dissociation channels observed (predominant loss of  $\text{H}_2\text{O}$  and  $\text{C}_3\text{N}_2\text{O}$  from the  $(\text{Sp}+\text{H})^+$  ion) indicate that the water adduct is likely the proton-bound cluster formed in the electrospray and not a product of an in-solution reaction.

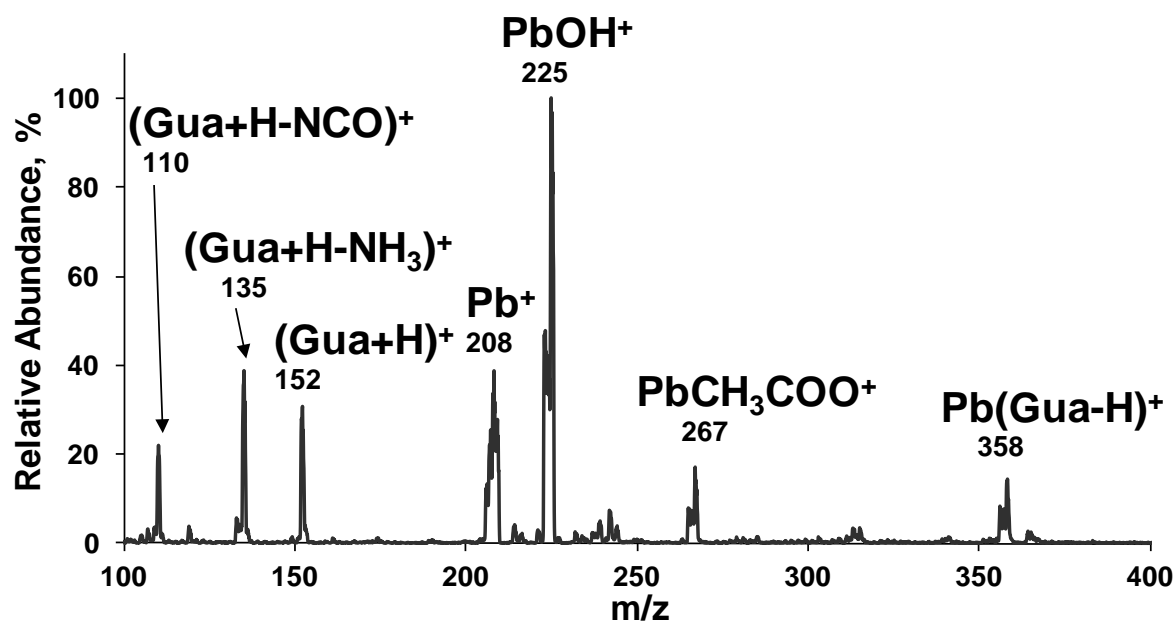

**Figure S2.** Mass spectrum for a solution containing guanine (Gua, 100 $\mu$ M) and lead acetate (1 mM). The observed products are: the lead(II)/deprotonated guanine complex [Pb(Gua-H)]<sup>+</sup>, protonated guanine (Gua+H)<sup>+</sup> and its in-source fragmentation products (Gua+H-NH<sub>3</sub>)<sup>+</sup> and (Gua+H-NCO)<sup>+</sup> as well as lead monoacetate, lead mono-hydroxide and the lead cation.

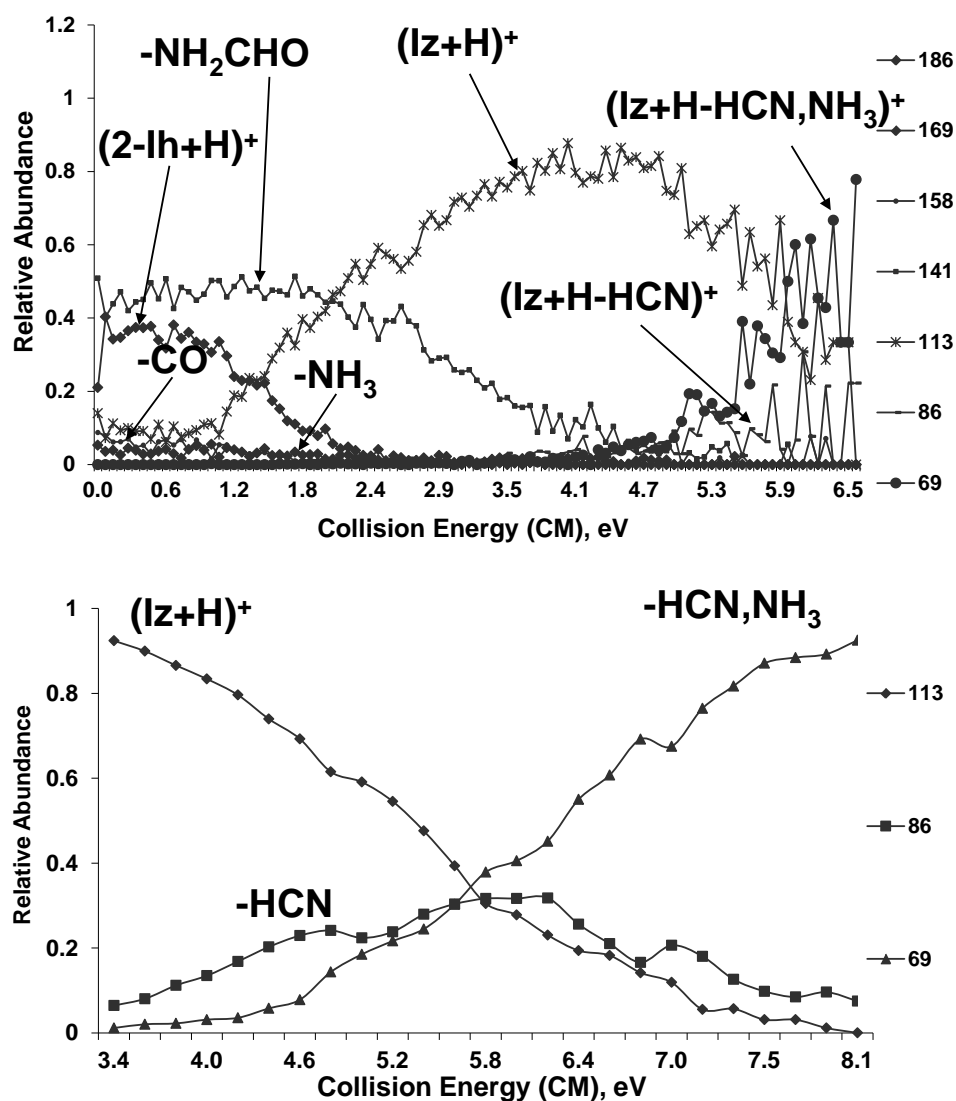

**Figure S3.** Dissociation profile for the product ions observed in oxidation of guanine by hydrogen peroxide:  $(2-lh+H)^+$  (top) and  $(lz+H)^+$  (bottom). The loss of  $NH_2CHO$  in  $(2-lh+H)^+$  was further explored by H-D exchange, it was found to contain only two exchangeable hydrogens and was thus assigned as  $NH_2CHO$  rather than  $NH_3+CO$ , both of which are observed as minor losses, but have different origin.
